# Supplementary material for: Prescribing, Supplying, and Administering Medicines.&nbsp;A Contemporary Review of Podiatric Surgery in the United Kingdom
Source: Research Square preprint supplement (doi:10.21203/rs.3.rs-267867/v1), 2021-03-08
Supplement: Supplementary file 1 [file 2f242504a687f9d4df3ecba8.docx]

Additional File 2. Compressed list of procedures. Compare to Full PASCOM report.

| Procedure name. | Count |
| --- | --- |
| Scarf +/-Akin’s any code | 3046 |
| Lesser toe arthrodesis | 2023 |
| Lesser toe arthroplasty | 1954 |
| Tendon procedure (any) | 1051 |
| Neuroma excision | 1029 |
| Lesser metatarsal osteotomy / excision of head | 1028 |
| Cheilectomy | 838 |
| First MTPJ arthrodesis | 777 |
| FIxation removal (screws, pins, wires, joints and plates) | 680 |
| Amputation digit ray / digit / part | 557 |
| Excision of soft tissue mass | 492 |
| Akin’s osteotomy | 471 |
| Arthrodesis midfoot 1st MCJ (Lapidus) | 461 |
| Skin plastic surgery (skin plasty / flaps / grafts) | 411 |
| Lesser toe osteotomy | 335 |
| Capsulotomy | 333 |
| Cryosurgery skin | 268 |
| Kessel Bonney osteotomy of hallux | 265 |
| Nail surgery | 242 |
| Joint replacement | 184 |
| Chevron capital osteotomy | 171 |
| Repair of capsule of joint for stabilisation | 150 |
| Medial exostectomy (silvers pattern) first metatarsal | 139 |
| Wound management | 136 |
| Arthrodesis mid foot | 124 |
| Excision of bone (any) | 110 |
| First MTP joint arthroplasty | 106 |
| Hallux IPJ arthrodesis with or without tendon balance | 98 |
| Subungual exostectomy | 91 |
| Therapeutic injection | 67 |
| Retrocalcaneal exostectomy | 65 |
| Prosthetic resurfacing of metatarsal head | 63 |
| Osteotomy of first metatarsal single foot (unspec.) | 61 |
| Syndactylisation of toe | 59 |
| Lesser MTPJ arthroplasty (Stainsby pattern) | 58 |
| Harvest bone graft | 57 |
| Arthrodesis hindfoot | 51 |
| Osteotripsy digital (spec.) | 47 |
| Fasciotomy division of fascia medial heel without optical guide | 43 |
| Osteotomy of calcaneus division of bone | 43 |
| Gastroc’ recession single | 32 |
| Open reduction internal fracture (ORIF) | 27 |
| Cautery of skin single e.g. verruca or granuloma | 22 |
| Biopsy | 21 |
| Excision of foreign body (e.g. Glass) | 19 |
| Sesamoid shave | 18 |
| Arthroplasty of hallux IPJ | 17 |
| Manipulation under anaesthetic | 16 |
| Excision lesion of tendon | 15 |
| Hallux osteotomy of proximal or distal hallux (unspec.) | 15 |
| Mid foot plantar exostectomy | 15 |
| Other osteotomy | 14 |
| Repair with bone grafting | 13 |
| Mixed foot e.g., MCJ fusion, other foot capital osteotomy | 12 |
| Excision of skin by punch biopsy | 10 |
| Chondroplasty | 9 |
| Subtalar arthroeresis blocking operation for flat foot | 9 |
| Other procedure | 9 |
| Arthroeresis inter-cuneiform fusion single foot | 7 |
| Needle biopsy of bone | 7 |
| Needling dry injection technique | 7 |
| Tarsal tunnel release | 7 |
| Nerve release or decompression | 6 |
| Osteotomy in midfoot | 6 |
| Desyndactylisation of toe | 4 |
| Metatarso-cuboid joint arthroplasty | 4 |
| Arthrodesis ankle | 3 |
| Excision of joint to form arthroplasty first mtpj | 3 |
| Osteotomy first metatarsal single foot (unspec.) | 3 |
| Revision bone grafting arthrodesis | 3 |
| Arthroscopy | 2 |
| Interdigital 3/4 release of ligament only one foot | 2 |
| Osteotomy of cuneiform | 2 |
| Bone lesion pathology (nb histology intended) | 1 |
| Calcaneal spur (unspec.) | 1 |
| First MTPJ arthrodesis from arthroplasty | 1 |
| Mulitple osteotomies (more than 3) single foot | 1 |
| Plantar calcaneal spur reduction open surgery reduction single | 1 |
